# Supplementary material for: Selected Alu methylation levels in the gastric carcinogenesis cascade
Source: PeerJ. 2025 May 20;13:e19485. doi: 10.7717/peerj.19485 (PMC12101442; doi:10.7717/peerj.19485)
Supplement: Supplemental Information 1 [file peerj-13-19485-s001.xlsx]

## Sheet: Sheet1
Code	Sex	Age	H. Pylori infection	EBV infection	%mC	%mCmC	%uCmC	%mCuC	%uCuC
NG01	Female	62	Negative	Negative	38.82	9.6	32.89	25.61	32.16
NG02	Female	50	Positive	Negative	41.06	13.52	32.8	24.58	30.7
NG03	Male	84	Negative	Negative	43.8	11.67	32.22	25.22	31.83
NG04	Male	93	Negative	Negative	40.39	12.37	32.57	25.12	31.14
NG05	Female	40	Negative	Negative	41.02	12.14	33.56	25.59	29.87
NG06	Female	18	Negative	Negative	39.02	11.31	33.13	23.77	33.16
NG07	Female	74	Negative	Negative	44.25	18	33.6	24.79	28.54
NG08	Female	23	Negative	Negative	46.96	37.42	29.07	23.92	28.5
NG09	Male	45	Negative	Negative	43.16	15.6	34.31	24.95	29
NG10	Female	90	Negative	Negative	42.79	15.34	33.81	25.08	29.43
NG11	Male	50	Negative	Negative	50.12	27.49	34.12	23.64	24.34
NG12	Female	73	Negative	Negative	47.47	29.64	22.6	27.48	29.46
NG13	Male	52	Negative	Negative	44.88	18.91	33.14	25.27	28.04
NG14	Male	55	Negative	Negative	45.34	20.93	32.33	24.51	28.35
CG01	Male	80	Negative	Negative	42.14	15.9	30.23	25.13	31.04
CG02	Female	56	Positive	Negative	40.64	15.27	29.08	24.42	33.12
CG03	Female	56	Positive	Negative	44.41	20.59	29.33	23.29	30.35
CG04	Female	31	Positive	Negative	46.03	21.81	29.17	24.73	28.45
CG05	Female	58	Positive	Negative	44.88	18.06	32.52	24.72	27.89
CG06	Male	63	Negative	Negative	46.79	23.77	30.98	21.31	28.48
CG07	Male	64	Negative	Negative	47.86	23.61	30.74	23.86	26.59
CG08	Female	56	Negative	Negative	49.99	27.29	30.7	22.42	25.45
CG09	Female	68	Positive	Negative	46.15	21.03	32.32	22.85	27.73
CG10	Female	40	Positive	Negative	41.19	16.43	28.4	24.41	32.97
CG11	Female	48	Positive	Negative	45.15	18.55	31.21	25.87	27.76
CG12	Female	54	Positive	Negative	43.94	16.51	31.32	26.51	28.44
CG13	Male	61	Negative	Negative	46.34	13.56	33.49	25.89	31.39
CG14	Male	65	Positive	Negative	45.6	12.53	32.05	27.32	31.95
CG15	Male	68	Positive	Negative	45.79	14.52	31.08	26.44	32.63
CG16	Female	68	Negative	Negative	45.23	13.25	31.37	26.62	32.82
CG17	Female	73	Negative	Negative	45.39	14.58	30.44	26.4	33.22
CG18	Male	81	Negative	Negative	45.55	14.48	30.96	26.24	32.95
CG19	Male	36	Negative	Negative	45.16	14.65	30.18	26.21	33.6
CG20	Male	68	Negative	Negative	46.22	14.84	31.19	26.68	32.17
CG21	Female	65	Positive	Negative	46.33	16.63	30.08	26.04	32.88
CG22	Male	69	Negative	Negative	45.8	17.32	29.3	25.24	33.96
CG23	Male	70	Positive	Negative	42.58	14.17	28.09	24.71	37.03
CG24	Male	31	Positive	Negative	43.93	14.16	35.53	26.3	25.94
CG25	Male	64	Negative	Negative	46.94	20.93	33.03	25.22	24.97
CG26	Female	73	Negative	Negative	43.73	16.65	32.12	25.93	27.94
CG27	Female	56	Negative	Negative	42.62	15.44	32.6	25.07	29.15
CG28	Female	69	Negative	Negative	38.08	12.95	33.02	19.79	35.69
CG29	Female	56	Negative	Negative	38.71	10.38	31.98	25.27	32.87
CG30	Male	76	Negative	Negative	45.51	36.25	26.97	24.37	30.45
CG31	Male	75	Negative	Negative	44.24	27.5	31.37	23.88	29.59
CG32	Female	63	Negative	Negative	43.62	32.94	27.86	22.61	32.36
IM01	Male	41	Negative	Negative	37.86	9.42	34.54	22.24	33.67
IM02	Female	22	Negative	Negative	36.98	8.26	33.5	24.28	34.1
IM03	Female	72	Negative	Negative	37.36	7.66	33.82	26.22	32.56
IM04	Male	56	Negative	Negative	36.89	7.27	35.02	24.95	33.1
IM05	Female	67	Positive	Negative	38.37	9.35	31.94	26.12	32.51
IM06	Male	85	Negative	Negative	38.65	9.94	34.34	22.86	32.62
IM07	Female	39	Negative	Negative	39.2	9.47	33.82	25.71	30.88
IM08	Female	49	Negative	Negative	38.2	8.22	37.82	22.59	31.47
IM09	Female	49	Negative	Negative	39.53	10.83	32.84	24.08	31.83
IM10	Male	61	Positive	Negative	36.53	6.98	34.5	25.43	33.51
IM11	Male	55	Positive	Negative	36.81	8.23	29.96	27.57	34.43
IM12	Male	52	Negative	Negative	37.92	8.36	32.2	27.32	32.25
IM13	Male	64	Negative	Negative	38.76	8.44	36.72	24.64	31.08
IM14	Female	82	Positive	Negative	41.46	10.16	34.45	24.42	31.2
IM15	Male	54	Negative	Negative	39.8	10.22	36.52	25.84	28.18
IM16	Female	60	Negative	Negative	38.91	8.92	34.37	26.08	31.37
IM17	Female	57	Positive	Negative	38.65	9.09	34.1	25.28	32.06
IM18	Female	67	Positive	Negative	40.89	11.45	32.32	25.41	30.7
IM19	Male	70	Negative	Negative	40.69	9.85	34.48	27.32	29.18
IM20	Female	66	Negative	Negative	38.77	8.17	33.57	28.78	30.75
IM21	Female	76	Negative	Negative	39.11	8.82	33.89	27.34	30.88
IM22	Male	63	Negative	Negative	38.18	8.13	32.95	28.24	31.78
IM23	Female	51	Positive	Negative	39.3	10.13	31.51	26.47	32.09
IM24	Male	70	Positive	Negative	39.26	9.1	34.81	25.89	30.93
IM25	Female	44	Negative	Negative	37.13	11.78	28.67	20.25	39.38
IM26	Female	76	Positive	Negative	36.13	10.64	29.93	19.91	40.19
IM27	Male	69	Negative	Negative	35.68	10.29	30.8	18.99	40.87
IM28	Female	30	Positive	Negative	37.7	9.88	34.17	21.1	34.42
IM29	Male	78	Negative	Negative	39.42	12.25	32.92	19.72	33.71
IM30	Female	83	Negative	Negative	38.44	10.84	34.09	20.2	34.02
IM31	Female	71	Negative	Negative	40.53	12.89	32.14	21.21	31.66
IM32	Female	79	Negative	Negative	42.7	13.11	31.48	25.87	27.36
IM33	Female	60	Negative	Negative	42.78	12.52	36.33	22.71	26.28
IM34	Male	41	Negative	Negative	43.73	13.82	35.03	22.58	25.93
IM35	Female	54	Negative	Negative	43.03	13.31	34.58	22.87	26.86
IM36	Male	85	Negative	Negative	41.81	12.08	33.91	24.24	27.97
DL01	Female	72	Negative	Negative	39.59	10.51	32.14	25.48	30.95
DL02	Male	60	Negative	Negative	35.86	7.3	32.05	26.15	35.13
DL03	Female	73	Negative	Negative	35.45	6.72	33.13	25.75	35.23
DL04	Female	65	Negative	Negative	38.95	9.43	34.27	24.86	30.87
DL05	Female	92	Negative	Negative	40.35	10.06	36.13	24.3	28.45
DL06	Male	70	Negative	Negative	40.54	11.96	31.69	24.03	30.85
DL07	Male	75	Negative	Negative	42.71	13.89	29.46	25.79	28.52
DL08	Male	63	Negative	Negative	45.29	32.21	30.02	23.74	29.47
DL09	Male	49	Negative	Negative	49.48	47.24	29.95	20.49	27.71
DL10	Male	72	Negative	Negative	46.39	37.43	31.02	20.99	29.42
DL11	Male	74	Negative	Negative	46.47	36.95	29.31	23.17	29.14
DL12	Female	55	Negative	Negative	45.98	35.02	30.9	22.1	29.28
DL13	Female	72	Negative	Negative	38.35	11.06	31.12	22.39	34.64
DL14	Female	72	Negative	Negative	39.57	12.51	29.28	22.98	33.72
DL15	Female	73	Negative	Negative	39.95	11.98	31.45	23.06	31.72
AD01	Female	71	Negative	Negative	40.83	14.56	27.72	21.77	33.75
AD02	Female	75	Negative	Negative	41.47	14.36	29.16	22.25	31.59
AD03	Male	70	Negative	Negative	39.19	17.28	30.09	21.39	35.51
AD04	Male	82	Negative	Negative	41.44	23.3	28.99	20.33	34.21
AD05	Female	40	Positive	Negative	38.74	17.94	29.9	20.17	37.14
AD06	Male	69	Negative	Positive	40.83	19.09	32.17	20.47	32.66
AD07	Male	68	Positive	Negative	39.64	18.83	31.67	19.2	35.5
AD08	Female	85	Positive	Negative	41.04	19.98	33.74	18.53	32.78
AD09	Female	59	Negative	Negative	40.94	20.69	31.03	20.16	33.55
AD10	Female	70	Negative	Negative	39.45	16.74	31.55	21.01	34.45
AD11	Female	62	Negative	Negative	36.54	10.07	31.59	22.56	36.95
AD12	Male	70	Positive	Positive	37.24	11.08	35.01	19.63	35.91
AD13	Female	50	Positive	Negative	40.51	21.77	28.92	20.31	35.46
AD14	Male	49	Positive	Negative	39.52	16.69	26.73	25.59	34.22
AD15	Female	60	Negative	Positive	39.43	11.91	30.64	23.43	32.72
AD16	Female	75	Negative	Negative	38.53	10.58	32.08	23.2	33.11
AD17	Male	61	Negative	Negative	37.93	11.04	28.22	25.01	35.56
AD18	Female	77	Negative	Negative	41.17	12.2	33.2	23.71	28.25
AD19	Female	42	Negative	Negative	38.82	11.52	29.91	23.89	33.81
AD20	Female	94	Negative	Negative	38.11	8.37	37.19	22.15	30.72
AD21	Male	51	Negative	Positive	39.47	12.83	29.97	21.91	34.09
AD22	Female	27	Positive	Negative	36.63	8.84	30.99	24.62	35.68
AD23	Female	76	Positive	Negative	37.7	8.99	32.62	24.8	32.89
AD24	Female	78	Negative	Negative	38.41	10.26	31.04	24.92	32.93
AD25	Female	78	Negative	Negative	35.91	6.89	35.39	23.05	34.55
AD26	Female	55	Negative	Negative	37.62	9.54	32.77	23.03	34.01
AD27	Female	64	Negative	Negative	35.92	6.38	32.77	32.52	31.84
AD28	Female	51	Negative	Negative	36.28	6.8	36.34	27.74	31.82
AD29	Female	63	Negative	Negative	35.7	7.2	36.48	24.12	34.25
